# Supplementary material
Source: PubMed Central journal article supplement (PMC3830942)
Supplement: NIHMS488421-supplement-Supplimentary.pdf [file NIHMS488421-supplement-Supplimentary.pdf]

**Figure 1. An overview of the TSH pathway page in NetPath.**

TSH pathway page in NetPath hosts the information on the number of molecules curated for TSH pathway, statistics of the total number of molecules, link to TSH pathway reactions and the list of genes which are differentially upregulated by TSH pathway. Every molecule in the pathway page is linked to the corresponding NetPath molecule page which is further linked to Entrez gene, HPRD, OMIM and Swiss-Prot identifiers. The reaction page of the TSH pathway contains the list of each type of reactions such as physical interactions, enzyme catalysis and transport with a brief description about the reactions with their PTM dependence or interacting regions/domains/ motifs whenever it was available in literature. The list of curators and reviewers are provided in the TSH pathway page with the details of the pathway authority. A comments tab is provided in the pathway page to invite the queries and suggestions from the community so as to update and improve TSH pathway alike other pathways in NetPath.

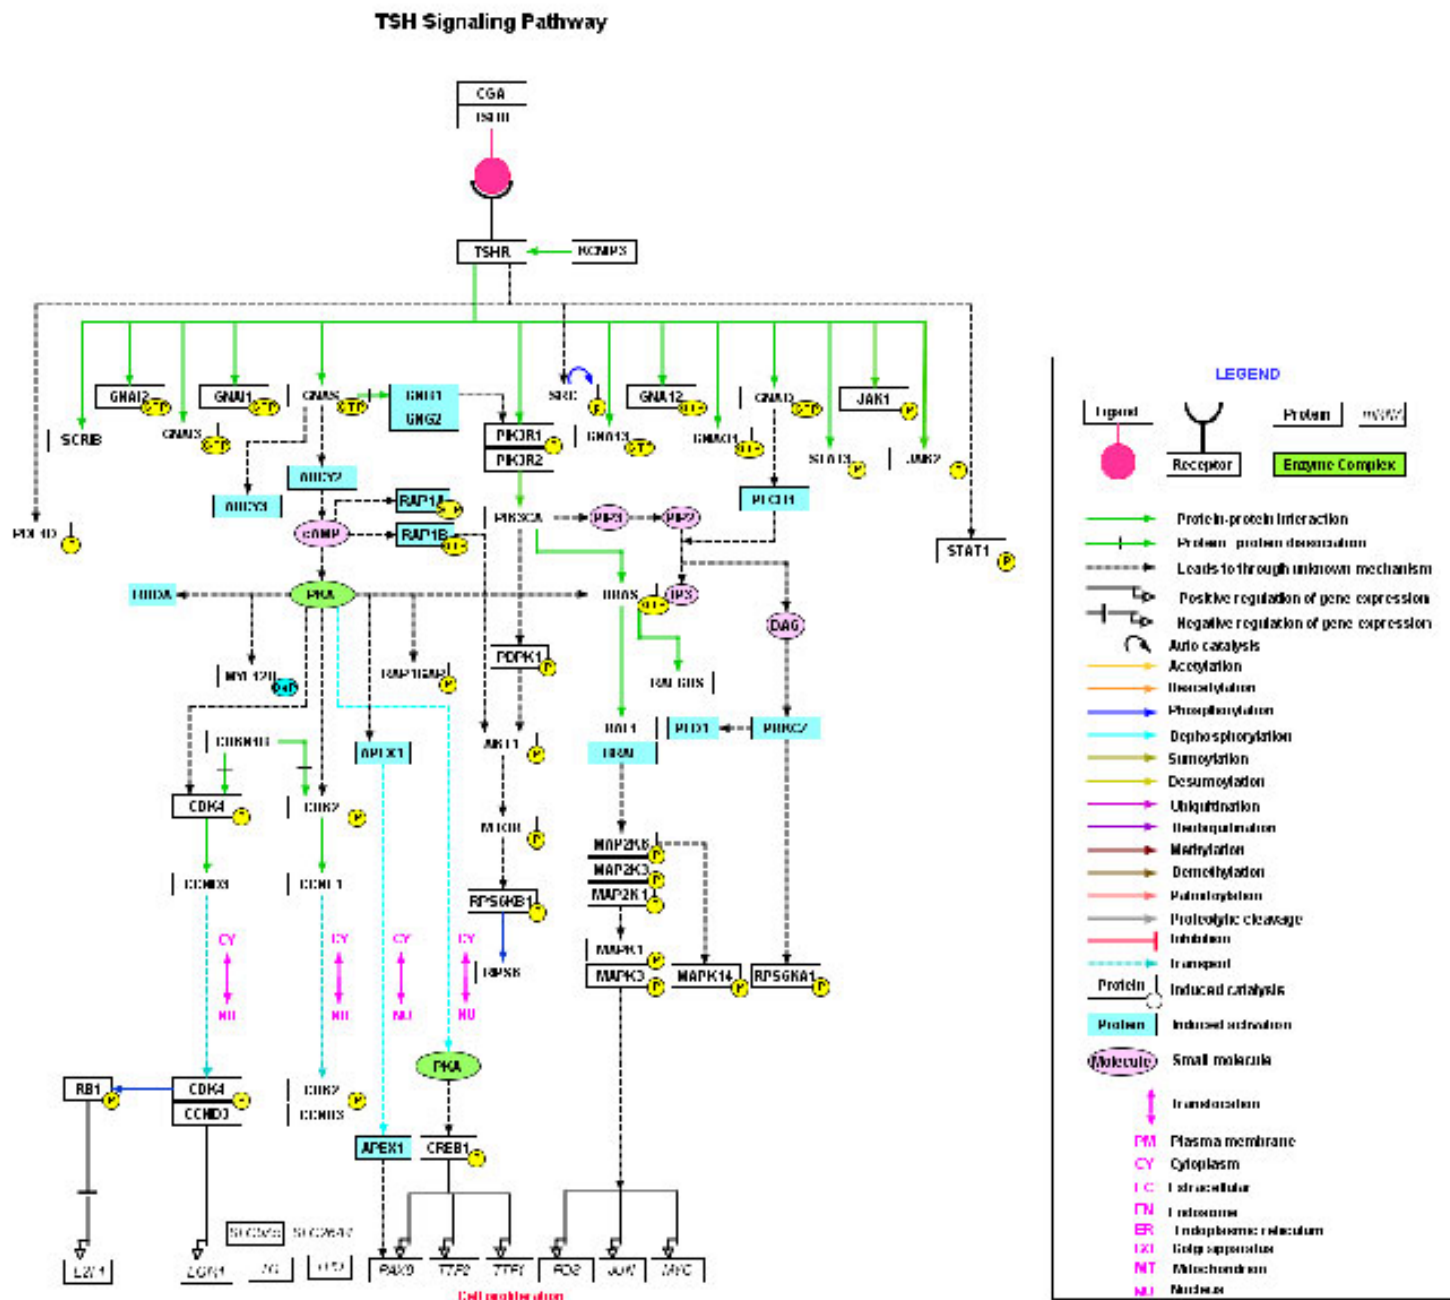

**Figure 2. Graphical representation of the TSH pathway by using PathVisio.**

TSH signaling pathway diagram were generated using selected reactions by NetSlim criteria. The molecules and reactions are represented by nodes and edges, respectively. Gene symbols of respective proteins are provided to identify each node. The square shaped nodes represent the gene symbols of proteins and the oval nodes represent small molecules. The molecules are arranged based on the information obtained from inhibitor, mutant or silencing studies. The solid arrows specify the direct association whereas the dashed arrows stands for the downstream reaction leading to the corresponding event represented in different colors. Legend is provided online along with pathway map at [http://www.netpath.org/netslim/TSH\\_pathway.html](http://www.netpath.org/netslim/TSH_pathway.html).

**NetSim**

HOME | CONTACT | ABOUT | HELP | LOGIN | REGISTER

SEARCH

SEARCH RESULTS: 1 - 1 of 1

1. **NetSim**

NetSim is a software tool for modeling and simulating biological systems. It is designed to be user-friendly and easy to use. The software is available for download on the NetSim website. For more information, please visit the NetSim website.

NetSim is a software tool for modeling and simulating biological systems. It is designed to be user-friendly and easy to use. The software is available for download on the NetSim website. For more information, please visit the NetSim website.

**NetPath**

HOME | CONTACT | ABOUT | HELP | LOGIN | REGISTER

SEARCH

SEARCH RESULTS: 1 - 1 of 1

1. **NetPath**

NetPath is a software tool for modeling and simulating biological systems. It is designed to be user-friendly and easy to use. The software is available for download on the NetPath website. For more information, please visit the NetPath website.

NetPath is a software tool for modeling and simulating biological systems. It is designed to be user-friendly and easy to use. The software is available for download on the NetPath website. For more information, please visit the NetPath website.

**NetSim**

HOME | CONTACT | ABOUT | HELP | LOGIN | REGISTER

SEARCH

SEARCH RESULTS: 1 - 1 of 1

1. **NetSim**

NetSim is a software tool for modeling and simulating biological systems. It is designed to be user-friendly and easy to use. The software is available for download on the NetSim website. For more information, please visit the NetSim website.

NetSim is a software tool for modeling and simulating biological systems. It is designed to be user-friendly and easy to use. The software is available for download on the NetSim website. For more information, please visit the NetSim website.

**NetPath**

HOME | CONTACT | ABOUT | HELP | LOGIN | REGISTER

SEARCH

SEARCH RESULTS: 1 - 1 of 1

1. **NetPath**

NetPath is a software tool for modeling and simulating biological systems. It is designed to be user-friendly and easy to use. The software is available for download on the NetPath website. For more information, please visit the NetPath website.

NetPath is a software tool for modeling and simulating biological systems. It is designed to be user-friendly and easy to use. The software is available for download on the NetPath website. For more information, please visit the NetPath website.

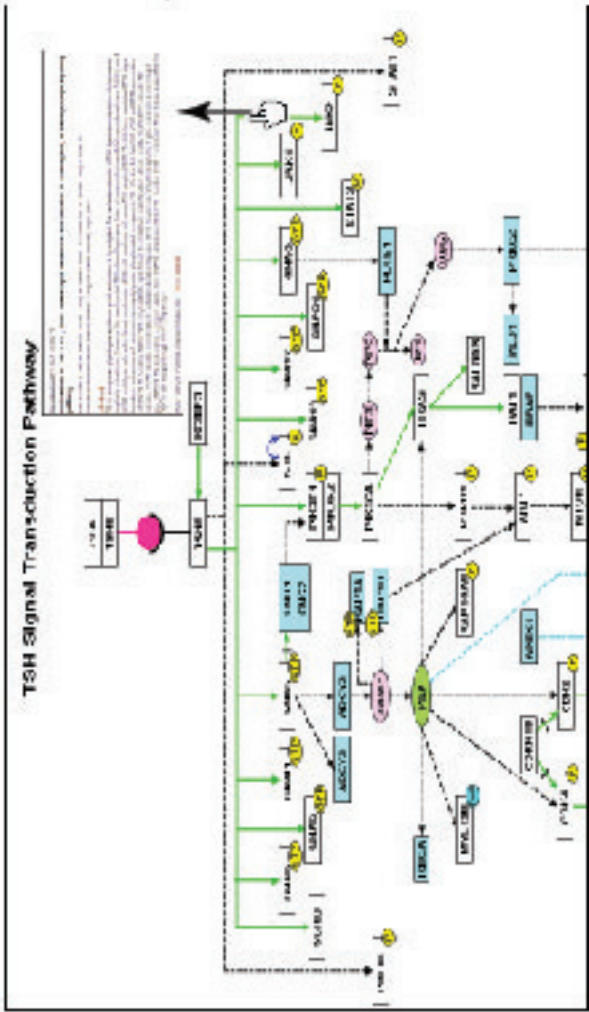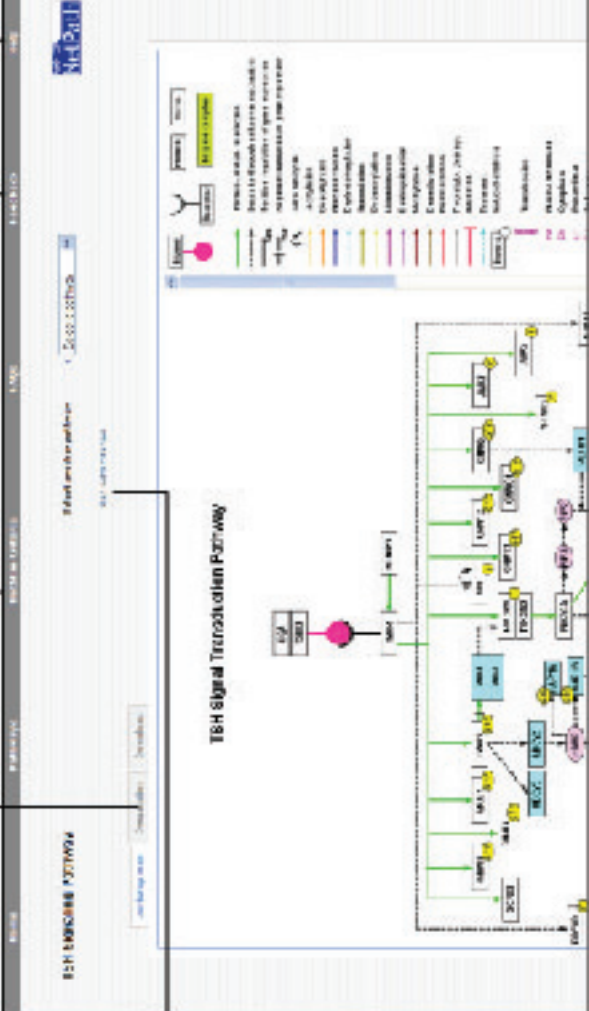

Figure 3. An overview of the TSH signaling pathway page in NetSim. The NetSim pathway page is linked to TSH pathway page in NetPath. The TSH pathway page in NetSim has TSH pathway description, pathway map, and options to download the pathway map and NetSim data. The map with citation can be visualized by clicking on the "map with citation" option. Pathway map can be downloaded in .gpmi, GenMAAPP and .pdf formats. TSH pathway is accessible for download in .gpmi, BioPAX and SBML formats.
